# Supplementary material for: Curative Treatment of Severe Gram-Negative Bacterial Infections by a New Class of Antibiotics Targeting LpxC
Source: PubMed Central journal article supplement (PMC5527309; doi:10.1128/mbio.00674-17), 2017-07-25
Supplement: mbo004173392s1.pdf [file mbo004173392s1.pdf]

1 **Supplementary Data 1. Large-scale synthesis of LPC-069.**

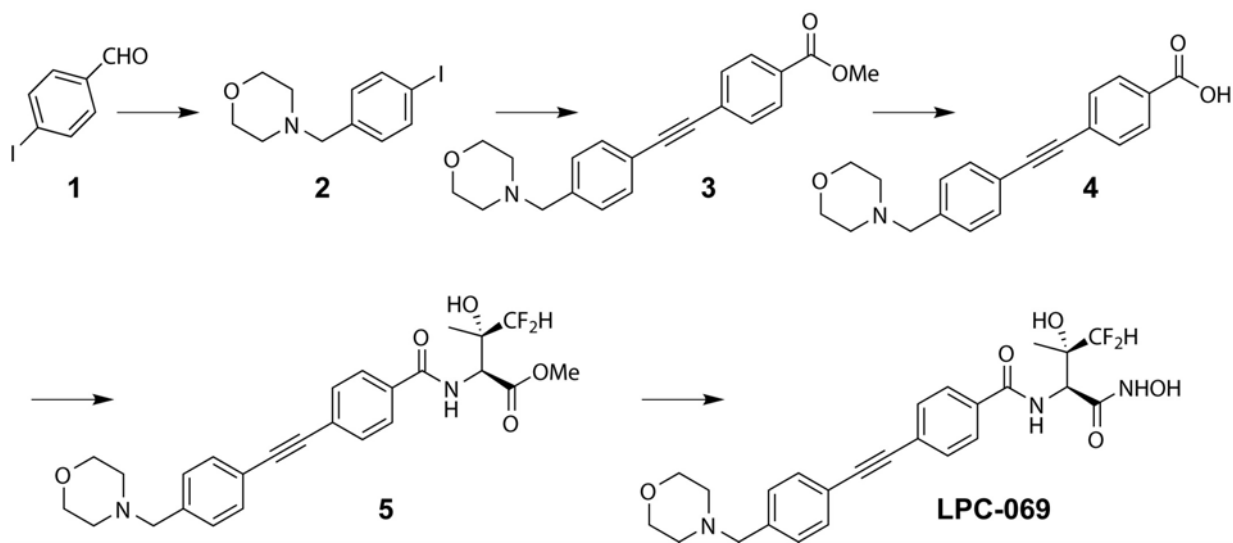

4 **4-(4-Iodobenzyl)morpholine(2):** To a solution of 4-iodobenzaldehyde (1) (2.67 g, 11.5  
5 mmol, 1.00 equiv) in anhydrous THF (50 mL) was added morpholine (1.25 g, 14.4 mmol,  
6 1.25 equiv) at room temperature under argon. The mixture was then cooled to 0 °C. 4.87  
7 g of NaHB(OAc)<sub>3</sub> was added in four portions. The reaction mixture was stirred at 0 °C for  
8 1 hr, and then was allowed to warm to room temperature for 15 hrs. The yellow  
9 suspension mixture was concentrated to dryness. The residue was diluted with water  
10 (100 mL), extracted with EtOAc (3×50 mL). The combined organic layers were washed  
11 with water (50 mL) and brine (50 mL), and then dried with Na<sub>2</sub>SO<sub>4</sub>. Evaporation of the  
12 solvent afforded the crude product, which was purified by flash chromatography (eluting  
13 with EtOAc in hexane 0-50%) to give the product as white solid (3.17 g, yield 91%). <sup>1</sup>H  
14 NMR (300 MHz, CDCl<sub>3</sub>): δ 2.41 (t, 4H, J=9.3 Hz), 3.42 (s, 2H), 3.69 (t, 4H, J=9.3 Hz),  
15 7.08 (d, 2H, J=8.4 Hz), 7.63 (d, 2H, J=8.4 Hz); <sup>13</sup>C (75 MHz, CDCl<sub>3</sub>): δ 53.80, 63.00,  
16 67.21, 92.71, 131.31, 137.59, 137.87; HPLC-MS (ESI, m/z): 303.1429 [M+H]<sup>+</sup>.

17

18 **Methyl 4-((4-(morpholinomethyl)phenyl)ethynyl)benzoate (3):** To a solution of  
19 compound **2** (1.81 g, 6.0 mmol, 1.20 equiv) in anhydrous THF (20 mL) was added  
20 methyl 4-ethynylbenzoate (0.8 g, 5.0 mmol, 1.00 equiv), Pd(Cl<sub>2</sub>(PPh<sub>3</sub>)<sub>2</sub>) (0.35 g, 0.5  
21 mmol, 0.10 equiv), PPh<sub>3</sub> (0.066 g, 0.25 mmol, 0.005 equiv), CuI (0.048 g, 0.25 mmol,  
22 0.05 equiv) and TEA (2.1 mL, 15.0 mmol, 3.0 equiv). The reaction mixture was then  
23 heated to 45 °C under argon for 14 hrs. The suspension mixture was concentrated to  
24 dryness. The residue was diluted with water (100 mL), extracted with EtOAc (3×50 mL).  
25 The combined organic layers were washed with water (50 mL) and brine (50 mL), and  
26 dried with Na<sub>2</sub>SO<sub>4</sub>. Evaporation of the solvent afforded the crude product, which was  
27 purified by flash chromatography (eluting with EtOAc in hexane 0-50%) to give the  
28 product as white solid (1.17 g, yield 70%). <sup>1</sup>H NMR (400 MHz, CDCl<sub>3</sub>): δ 2.41 (br, s, 4H),  
29 3.47 (s, 2H), 3.68 (t, 4H, J=8.8 Hz), 3.89 (s, 3H), 7.30 (d, 2H, J=8 Hz), 7.47 (d, 2H, J=8  
30 Hz), 7.55 (d, 2H, J=10.4 Hz), 7.99 (d, 2H, J=10.4 Hz); <sup>13</sup>C (100 MHz, CDCl<sub>3</sub>): δ 52.19,  
31 53.60, 63.09, 66.96, 88.52, 92.31, 121.42, 128.01, 129.13, 129.39, 129.49, 131.44,  
32 131.64, 138.85, 166.49; HPLC-MS (ESI, m/z): 335.4036 [M+H]<sup>+</sup>.

33

34 **4-((4-(Morpholinomethyl)phenyl)ethynyl)benzoic acid (4):** To a solution of methyl  
35 ester **3** (0.73 g, 2.2 mmol, 1.0 equiv) in methanol (8 mL) and H<sub>2</sub>O (4 mL) was added  
36 LiOH.H<sub>2</sub>O (0.097 g, 2.3 mmol, 1.05 equiv). The reaction mixture was heated to reflux for  
37 3 hrs under argon. The resulting mixture was concentrated to dryness. The residue was  
38 diluted with 30 mL of water and added 1N HCl to pH around 3. The white precipitate was  
39 filtered and dried to afford the compound as white solid (0.66 g, yield 93%). <sup>1</sup>H NMR

40 (300 MHz, DMSO-d<sub>6</sub>): δ 2.63 (br, s, 4H), 3.66 (br, s, 4H), 3.80 (s, 2H), 7.47 (d, 2H, J=7.6  
41 Hz), 7.55 (d, 2H, J=7.6 Hz), 7.62 (d, 2H, J=8.4 Hz), 7.93 (d, 2H, J=8.4 Hz); <sup>13</sup>C (75 MHz,  
42 DMSO-d<sub>6</sub>): δ 53.60, 63.09, 66.96, 88.52, 92.31, 121.42, 128.01, 129.13, 129.39, 129.49,  
43 131.44, 131.64, 138.85, 166.49; HPLC-MS (ESI, m/z): 322.1469[M+H]<sup>+</sup>.

44  
45 **(2S, 3S)-methyl-4,4-difluoro-3-hydroxy-3-methyl-2-(4-((4 (morpholinomethyl)**  
46 **phenyl)ethynyl)benzamido)butanoate (5):** To a solution of acid **4** (73 mg, 0.228  
47 mmol, 1.00 equiv) in anhydrous DMF (1 mL) was added amino acid methyl ester (31) (93  
48 mg, 0.273 mmol, 1.20 equiv), EDC (52 mg, 0.273 mmol, 1.20 equiv), HOBT (37 mg, 1.20  
49 equiv, 37 mmol) and DIPEA (0.24 mL, 1.14 mmol, 5.0 equiv) at room temperature under  
50 argon. The reaction mixture was stirred at room temperature for 14 hrs. The resulting  
51 mixture was concentrated to dryness. The residue was diluted with water (20 mL),  
52 extracted with EtOAc (3×50 mL). The combined organic layers were washed with water  
53 (50 mL) and brine (50 mL), and then dried with Na<sub>2</sub>SO<sub>4</sub>. Evaporation of the solvent  
54 afforded the crude product, which was purified by flash chromatography (eluting with  
55 MeOH in DCM 0-3%) to provide the product as white solid (95 mg, yield 86%). <sup>1</sup>H  
56 (300MHz, CDCl<sub>3</sub>): δ 1.38 (s, 3H), 2.44 (t, 4H, J=9 Hz), 3.50 (s, 2H), 3.70 (t, 4H, J=9 Hz),  
57 3.81 (s, 3H), 5.03 (d, 1H, J=9 Hz), 5.77 (t, 1H, J=55.6 Hz), 7.04 (d, 1H, J=9 Hz), 7.32 (d,  
58 2H, J=8.1 Hz), 7.49 (d, 2H, J=7.8 Hz), 7.58 (d, 2H, J=7.8 Hz), 7.79 (d, 2H, J=8.1 Hz);  
59 <sup>13</sup>C (75 MHz, CDCl<sub>3</sub>): δ 18.08, 52.92, 53.58, 55.98, 63.08, 66.96, 74.04, 88.31, 92.2,  
60 105.00, 115.78, 127.27, 127.48, 127.82, 129.16, 131.66, 131.77, 132.25, 138.83,  
61 167.06, 170.22; <sup>19</sup>F (300 MHz, CDCl<sub>3</sub>): δ -129.26, -134.68 (ABq, J<sub>HH</sub>=49.8 Hz, J<sub>HF</sub>=180.9  
62 Hz); HPLC-MS (ESI, m/z): 487.2373 [M+H]<sup>+</sup>.

63

64 **N-((2S,3S)-4,4-difluoro-3-hydroxy-1-(hydroxyamino)-3-methyl-1-oxobutan-2-yl)-4-**  
65 **((4-(morpholinomethyl)phenyl)ethynyl)benzamide (LPC-069):** To a solution of methyl  
66 ester **5** (84 mg, 0.18 mmol, 1.0 equiv) in methanol (4 mL) was added KCN (10 mg) at 0  
67 °C under argon. Then 2 mL of 50% NH<sub>2</sub>OH was added. The reaction mixture was stirred  
68 at 0 °C for 2 hrs, and then was allowed to warm to room temperature for 14 hrs. The  
69 resulting mixture was concentrated to dryness. The residue was diluted with water (100  
70 mL), extracted with EtOAc(3×30 mL). The combined organic layers were washed with  
71 water (50 mL), brine (50 mL) and dried (Na<sub>2</sub>SO<sub>4</sub>). Evaporation of the solvent afforded  
72 the crude product, which was purified by flash chromatography (eluting with MeOH in  
73 DCM 0-10%) to give the product as white solid (63 mg, yield 72%). <sup>1</sup>H (300 MHz,  
74 CD<sub>3</sub>OD): δ 1.36 (s, 3H), 2.47 (t, 4H, J=9Hz), 3.55 (s, 2H), 3.69 (t, 4H, J=9 Hz), 4.73 (s,  
75 1H), 5.80 (t, 1H, J=56.2 Hz), 7.38 (d, 2H, J=8.1 Hz), 7.51 (d, 2H, J=8.1 Hz), 7.62 (d, 2H,  
76 J=8.1 Hz), 7.86 (d, 2H, J=8.1 Hz); <sup>13</sup>C (75MHz, CD<sub>3</sub>OD): δ 17.77, 53.61, 55.25, 62.43,  
77 66.63, 72.94, 88.94, 91.94, 116.35, 120.87, 125.91, 128.42, 129.66, 131.67, 131.84,  
78 133.86, 139.73, 165.24, 165.96; <sup>19</sup>F (300MHz, CD<sub>3</sub>OD): δ -127.98, -136.07(ABq,  
79 J<sub>HH</sub>=30.3 Hz, J<sub>HF</sub>=177.8 Hz); HRMS: C<sub>27</sub>H<sub>27</sub>F<sub>2</sub>N<sub>3</sub>O<sub>5</sub> calculated 487.1919, obtained  
80 487.1925.

81
