# Supplementary material for: Curative Treatment of Severe Gram-Negative Bacterial Infections by a New Class of Antibiotics Targeting LpxC
Source: PubMed Central journal article supplement (PMC5527309; doi:10.1128/mbio.00674-17), 2017-07-25

Supplementary Figure 2

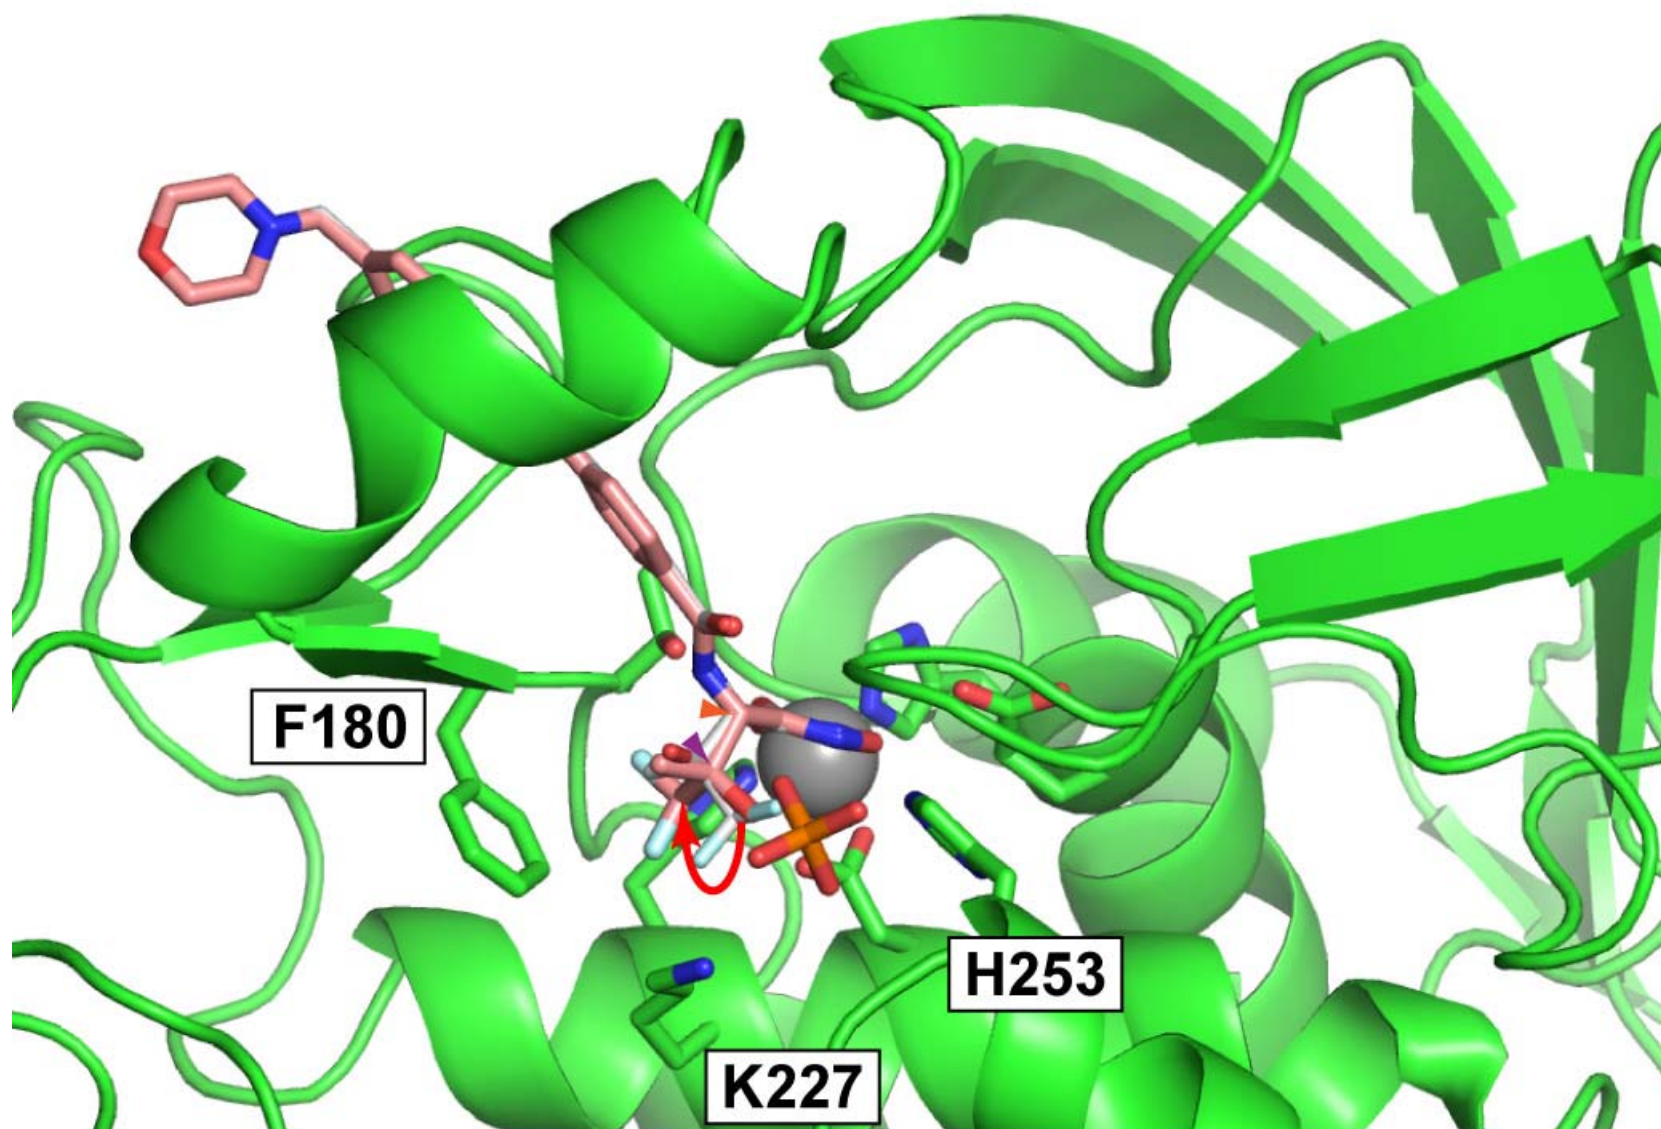

Supplement: mbo004173392sf2.pdf [file mbo004173392sf2.pdf]
