# Supplementary material for: Curative Treatment of Severe Gram-Negative Bacterial Infections by a New Class of Antibiotics Targeting LpxC
Source: PubMed Central journal article supplement (PMC5527309; doi:10.1128/mbio.00674-17), 2017-07-25
Supplement: mbo004173392st1.pdf [file mbo004173392st1.pdf]

1 **Supplementary Table 1.** Antimicrobial activity of LPC-069 against clinical isolates of  
 2 *Enterobacteriaceae*, *Pseudomonas aeruginosa* and *Acinetobacter baumannii*.

| Organism group<br>(number of isolates tested)                            | MIC (mg/L) | LPC-069   |
|--------------------------------------------------------------------------|------------|-----------|
| <i>E. coli</i> (n=20)                                                    | MIC 50     | 0.1       |
|                                                                          | MIC 90     | 0.2       |
|                                                                          | Range      | 0.05-0.4  |
| <i>K. pneumoniae</i> (n=22)<br>Including 15 MDR/XDR strains <sup>a</sup> | MIC 50     | 0.4       |
|                                                                          | MIC 90     | 0.8       |
|                                                                          | Range      | 0.2-0.8   |
| <i>Enterobacter. spp</i> (n=20)<br>Including 9 MDR/XDR strains           | MIC 50     | 0.2       |
|                                                                          | MIC 90     | 0.4       |
|                                                                          | Range      | 0.1-1.6   |
| <i>P. mirabilis</i> (n=20)                                               | MIC 50     | 0.2       |
|                                                                          | MIC 90     | 0.4       |
|                                                                          | Range      | 0.2-0.8   |
| <i>C. koseri</i> (n=25)                                                  | MIC 50     | 0.4       |
|                                                                          | MIC 90     | 0.4       |
|                                                                          | Range      | 0.1-1.6   |
| <i>C. freundii</i> (n=12)<br>Including 2 MDR/XDR strains                 | MIC 50     | 0.2       |
|                                                                          | MIC 90     | 0.4       |
|                                                                          | Range      | 0.2-0.4   |
| <i>S. marcescens</i> (n=20)<br>Including 5 MDR/XDR strains               | MIC 50     | 0.2       |
|                                                                          | MIC 90     | 0.2       |
|                                                                          | Range      | 0.1-0.4   |
| <i>M. morgani</i> (n=23)<br>Including 7 MDR/XDR strains                  | MIC 50     | 0.2       |
|                                                                          | MIC 90     | 0.8       |
|                                                                          | Range      | 0.2-1.6   |
| <i>Yersinia spp.</i> (n=20)                                              | MIC 50     | 0.4       |
|                                                                          | MIC 90     | 0.8       |
|                                                                          | Range      | 0.2-0.8   |
| <i>Shigella spp.</i> (n=21)                                              | MIC 50     | 0.05      |
|                                                                          | MIC 90     | 0.1       |
|                                                                          | Range      | 0.025-0.2 |
| <i>Salmonella spp</i> (n=22)                                             | MIC 50     | 0.4       |
|                                                                          | MIC 90     | 0.4       |
|                                                                          | Range      | 0.2-0.8   |
| <i>P. aeruginosa</i> (n=51)<br>Including 20 MDR/XDR strains <sup>b</sup> | MIC 50     | 1.6       |
|                                                                          | MIC 90     | 3.2       |
|                                                                          | Range      | 0.2-3.2   |
| <i>A. baumannii</i> (n=25)<br>Including 19 MDR/XDR strains <sup>c</sup>  | MIC 50     | 0.8       |
|                                                                          | MIC 90     | 3.2       |
|                                                                          | Range      | 0.5-≥6.4  |

3  
4

5 <sup>a</sup>, includes five carbapenemase-producing strains (1 KPC-2, 1 NDM-1 and 3 OXA-48); <sup>b</sup>,  
 6 includes five carbapenemase-producing strains (4 VIM and one IMP); <sup>c</sup>, includes eight  
 7 carbapenemase-producing strains (7 OXA-23 strains and one OXA-40 strains)
