# Supplementary material for: Curative Treatment of Severe Gram-Negative Bacterial Infections by a New Class of Antibiotics Targeting LpxC
Source: PubMed Central journal article supplement (PMC5527309; doi:10.1128/mbio.00674-17), 2017-07-25
Supplement: mbo004173392st2.pdf [file mbo004173392st2.pdf]

1 **Supplementary Table 2. Data collection and refinement statistics**

| <i>A. aeolicus</i> LpxC/LPC-069     |                               |
|-------------------------------------|-------------------------------|
| <b>Data collection</b>              |                               |
| Wavelength                          | 1.0000 Å                      |
| Space group                         | P 61                          |
| Cell dimensions                     |                               |
| <i>a</i> , <i>b</i> , <i>c</i> (Å)  | 65.99, 65.99, 132.42          |
| $\alpha$ , $\beta$ , $\gamma$ (°)   | 90.0, 90.0, 120.0             |
| Resolution (Å)                      | 50.0 – 1.62<br>(1.66 – 1.62)  |
| $R_{\text{meas}}$                   | 9.7 (76.2)                    |
| $I / \sigma I$                      | 20.13 (4.95)                  |
| Completeness (%)                    | 100 (100)                     |
| Redundancy                          | 12.4 (12.4)                   |
| <b>Refinement</b>                   |                               |
| Resolution (Å)                      | 29.53 – 1.62<br>(1.66 – 1.62) |
| Unique reflections                  | 41379 (2956)                  |
| Redundancy                          | 12.4 (12.4)                   |
| $R_{\text{work}} / R_{\text{free}}$ | 0.139/0.154                   |
| No. atoms                           | 2869                          |
| protein                             | 2323                          |
| ligand/ion                          | 98                            |
| water                               | 448                           |
| Average <i>B</i> -factors           | 18.29                         |
| protein                             | 15.36                         |
| ligand/ion                          | 19.49                         |
| water                               | 33.19                         |
| R.m.s. deviations                   |                               |
| bond lengths (Å)                    | 0.006                         |
| bond angles (°)                     | 0.90                          |
| Ramachandran                        |                               |
| Favored (%)                         | 96.9                          |
| allowed (%)                         | 3.1                           |
| outliers (%)                        | 0.0                           |

2 \*Values in parentheses correspond to the highest-resolution shell.

3
