# Supplementary material for: Curative Treatment of Severe Gram-Negative Bacterial Infections by a New Class of Antibiotics Targeting LpxC
Source: PubMed Central journal article supplement (PMC5527309; doi:10.1128/mbio.00674-17), 2017-07-25
Supplement: mbo004173392st3.pdf [file mbo004173392st3.pdf]

1 **Supplementary Table 3.** Pharmacokinetics of the LpxC inhibitors LPC-058 and LPC-069

Pharmacokinetic parameters

| Compound | with liver microsomes  |                                                               | in mice <sup>a</sup>                        |                        |                                                          |                               |
|----------|------------------------|---------------------------------------------------------------|---------------------------------------------|------------------------|----------------------------------------------------------|-------------------------------|
|          | T <sub>1/2</sub> (min) | Intrinsic clearance<br>( $\mu\text{L}/\text{min}/\text{mg}$ ) | AUC<br>( $\mu\text{L}/\text{h}/\text{mL}$ ) | T <sub>1/2</sub> (min) | Plasma clearance<br>( $\text{mL}/\text{min}/\text{kg}$ ) | Distribution volume<br>(L/kg) |
| LPC-058  | 95                     | 24                                                            | 21.7                                        | 53                     | 15                                                       | 1.1                           |
| LPC-069  | 44                     | 52                                                            | 2.5                                         | 10                     | 262                                                      | 3.8                           |

2 <sup>a</sup> determined after the intravenous injection of 20 mg/kg LPC-058 or 40 mg/kg of LPC-069. T<sub>1/2</sub>: half-life; AUC: area  
 3 under the curve.

4
